# Supplementary material
Source: publisher figshare collection journal article supplement (https://acs.figshare.com/ndownloader/files/23855575)
Supplement: Supplementary file 1 [file 23855575]

**Supporting Information of**

**Atomic Layer Deposition onto  
Thermoplastic Polymeric Nanofibrous  
Aerogel Templates for Tailored Surface  
Properties**

Jianwei Lu<sup>1,2,3</sup>, Yi Li<sup>3,4</sup>, Wei Song<sup>1</sup>, Mark D. Losego<sup>3,4</sup>, Rebhadevi Monikandan<sup>5</sup>,  
Karl I. Jacob<sup>2,3,4\*</sup>, Ru Xiao<sup>1\*</sup>

*1. State Key Laboratory for Modification of Chemical Fibers and Polymer*

*Materials, College of Materials Science and Engineering, Donghua University,*

*Shanghai 2016, P. R. China*

*2. School of Materials Science and Engineering, Georgia Institute of Technology,*

*Atlanta, Georgia 30332*

*3. The Georgia W. Woodruff School of Mechanical Engineering, Georgia Institute of*

*Technology, Atlanta, Georgia 30332*

*4. Renewable Bioproducts Institute, Georgia Institute of Technology, Atlanta,*

*Georgia 30332*

*5. Materials Characterization Facility, Georgia Institute of Technology, Atlanta,*

*Georgia 30332, United States*

*Correspondence to: Karl I. Jacob (E-mail: karl.jacob@mse.gatech.edu)*

*Ru Xiao (E-mail: xiaoru@dhu.edu.cn)*

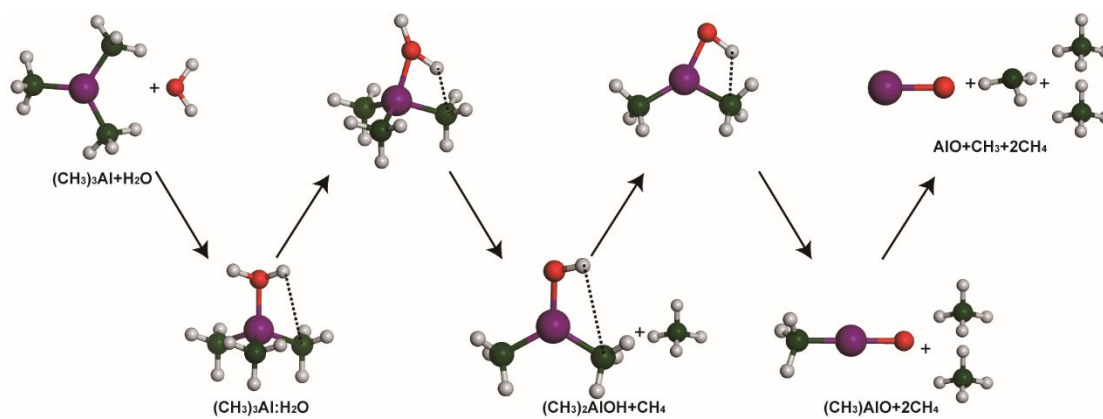

**Figure S1 The reaction mechanisms of trimethylaluminum (TMA) with water.<sup>1</sup>**

The reaction mechanisms of TMA with water were written as follows:

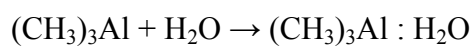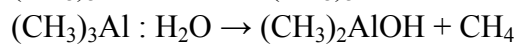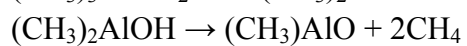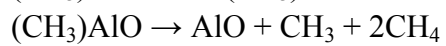

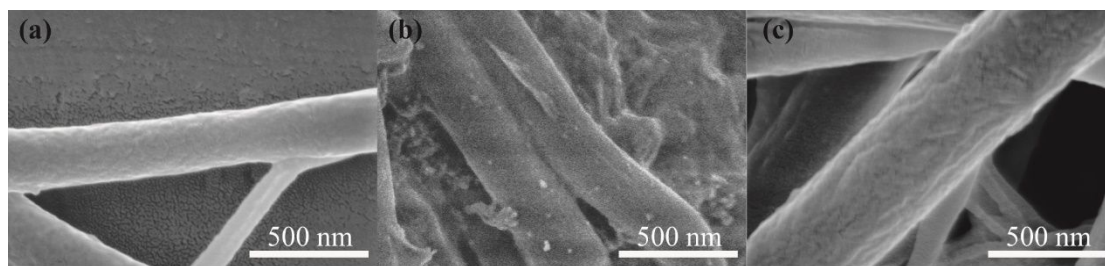

**Figure S2** FE-SEM micrographs of surface's EVOH nanofibers with (a) 0, (b)6 and (c) 100 ALD cycles, the surface variation of EVOH nanofibers on the surface of aerogels was observed, demonstrating  $\text{Al}_2\text{O}_3$  particles could uniformly deposit both the exterior and interior of the aerogels.

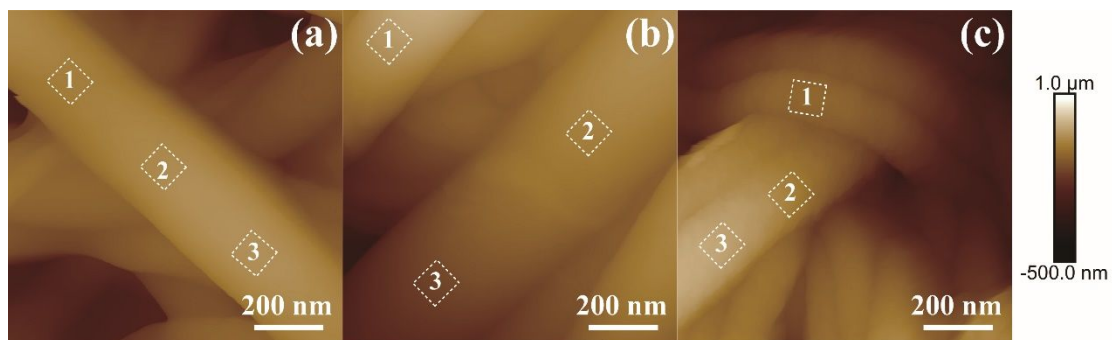

**Figure S3 AFM images of EVOH nanofibers in (a) 0, (b) 6 and (c) 100cy-ALD aerogels, demonstrating the surface roughness variations of nanofibers with different ALD cycles. The surface roughness of EVOH nanofibers increased after 6 ALD cycles. While the surface roughness of EVOH nanofibers decrease, with ALD cycles continued increase to 100.**

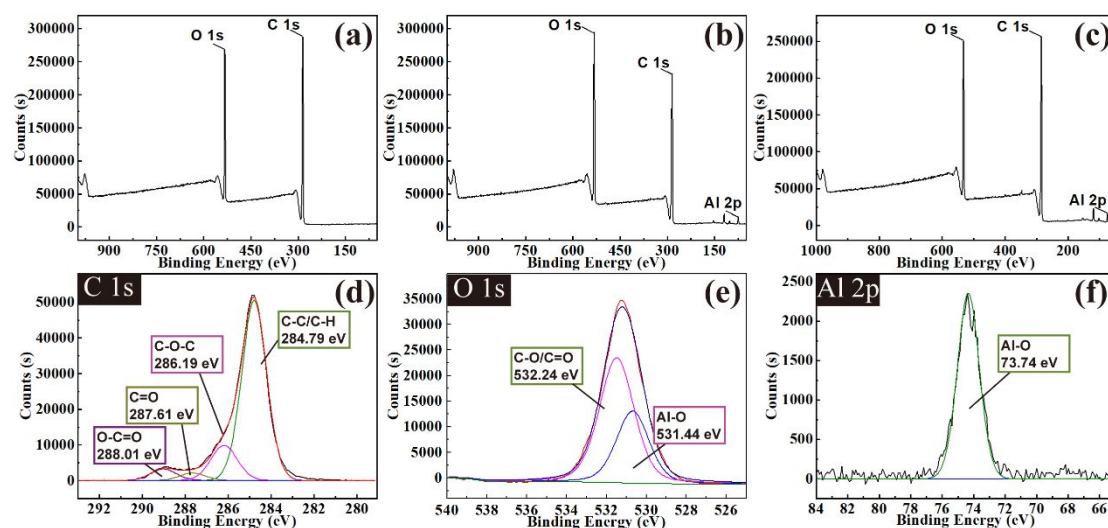

**Figure S4** XPS survey scans of (a) 0, (b) 1 and (c) 6cy-ALD aerogels, XPS spectra for (d) carbon, (e) oxygen and (f) aluminum for 6cy-ALD aerogels, demonstrating the successful deposition of  $\text{Al}_2\text{O}_3$  on the surface of aerogels after 6 ALD cycles.

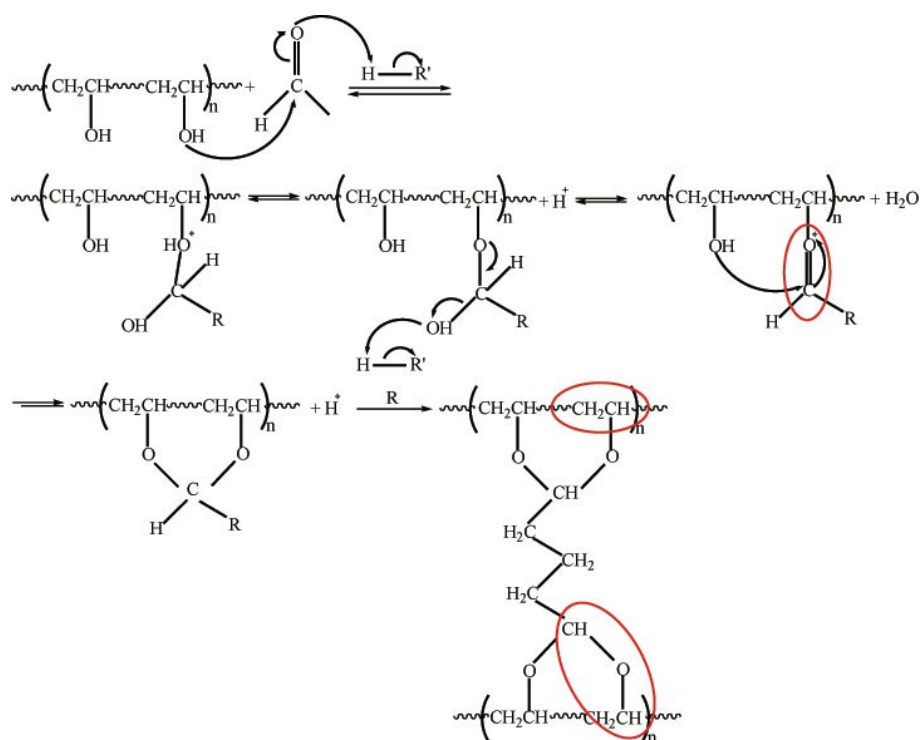

**Figure S5 Mechanism of cross-linking between EVOH nanofibers and GA, demonstrating the formation of C-C, C-O-C and C=O.**

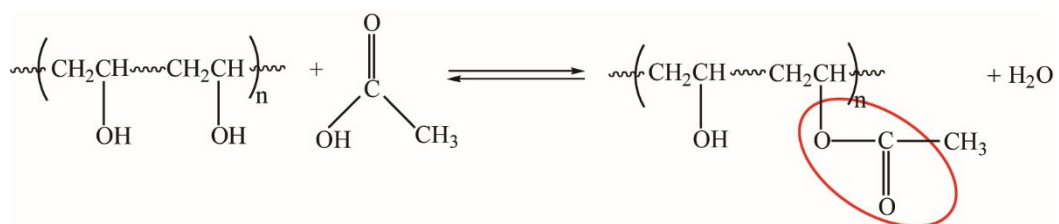

**Figure S6 Mechanism of esterification reaction of EVOH nanofibers and acetic acid, demonstrating the formation of O-C=O.**

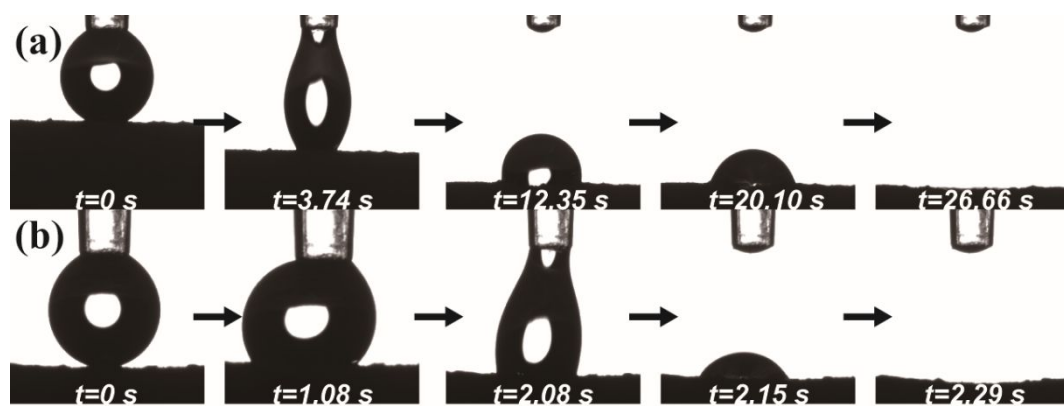

**Figure S7** Photographs show the dynamic water contact angles of (a) 0 and (b) 8cy-ALD aerogels, the variation of water droplets on the surface of aerogels was observed. The water droplets were absorbed quickly by 0 and 8cy-ALD aerogels, demonstrating their hydrophilic surface.

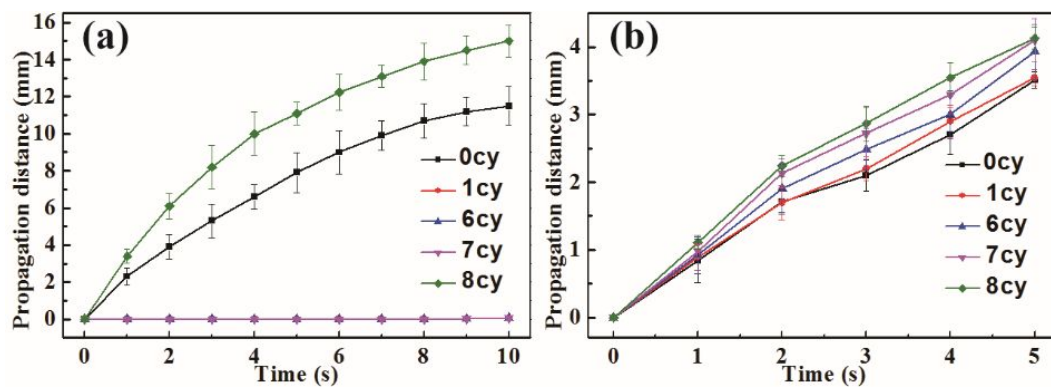

**Figure S8** The variation of propagation distance of aerogels as a function of time: (a) water wicking performance and (b) oil wicking performance, demonstrating 8cy-ALD aerogels showed higher water wicking performance than 0cy-ALD aerogels, and all aerogels exhibited good oil wicking performance.



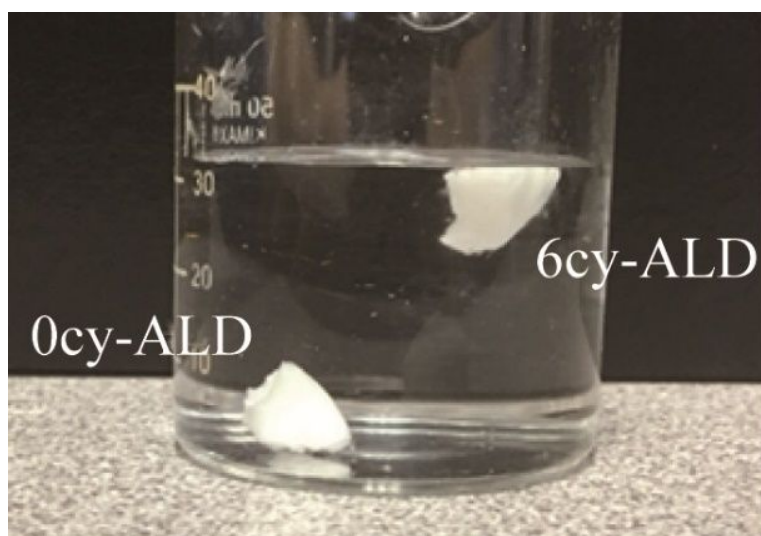

**Figure S9 0 and 6cy-ALD aerogels immersed into water after absorption saturation, demonstrating the difference in water absorption between 0 and 6cy-ALD aerogels.**

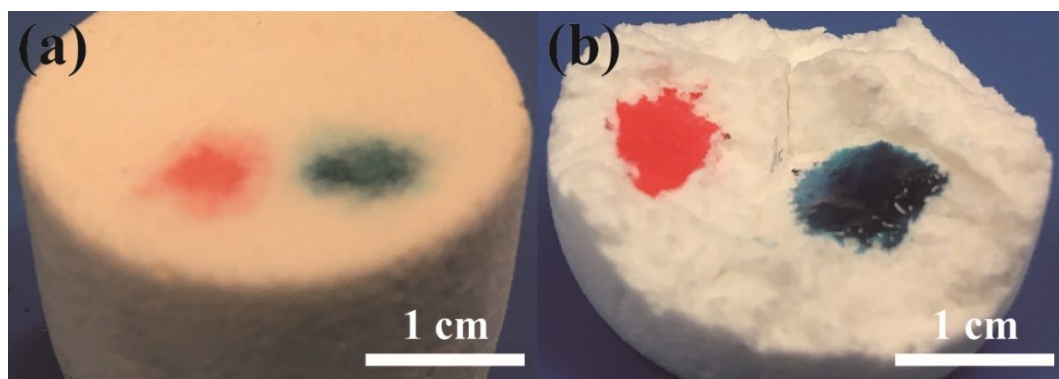

**Figure S10** The dyed water droplets on the (a) exterior and (b) interior of 100cy-ALD aerogels, demonstrating both the exterior and interior of 100cy-ALD exhibit hydrophilic.

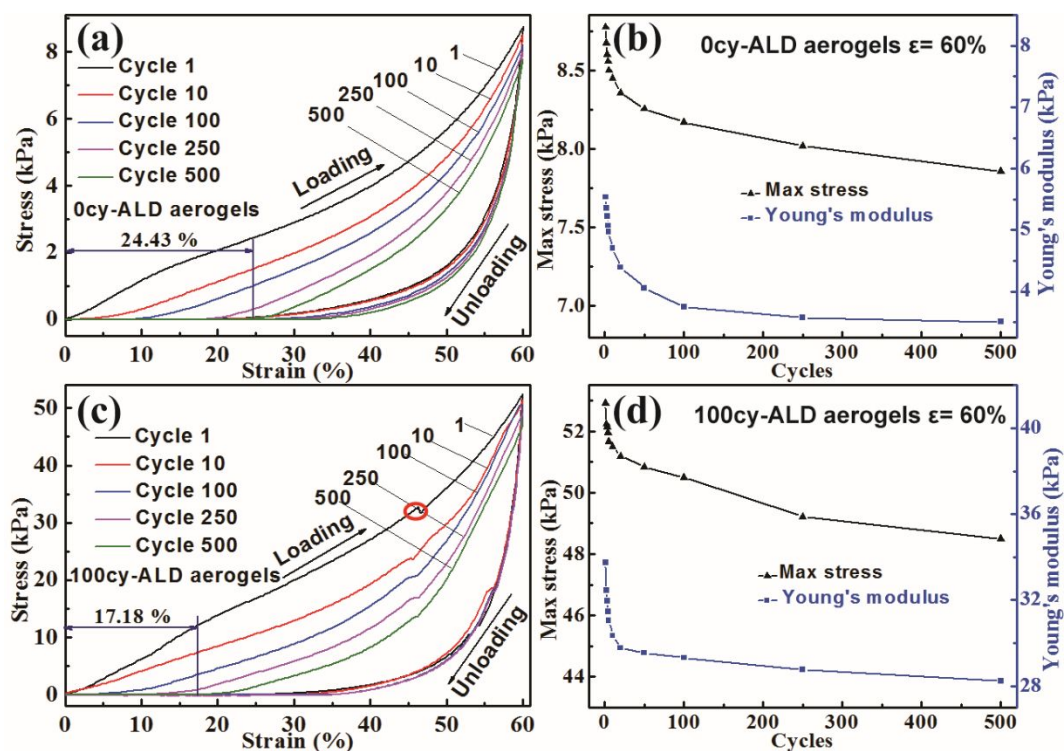

**Figure S11** Cyclic stress–strain curves of (a) 0 and (c) 100cy-ALD aerogels with  $\epsilon$  of 60%, (b) and (d) the corresponding Young's modulus and maximum stress as a function of the compressive test cycles, demonstrating that 0 and 100cy-ALD aerogels exhibited good mechanical durability and stability.

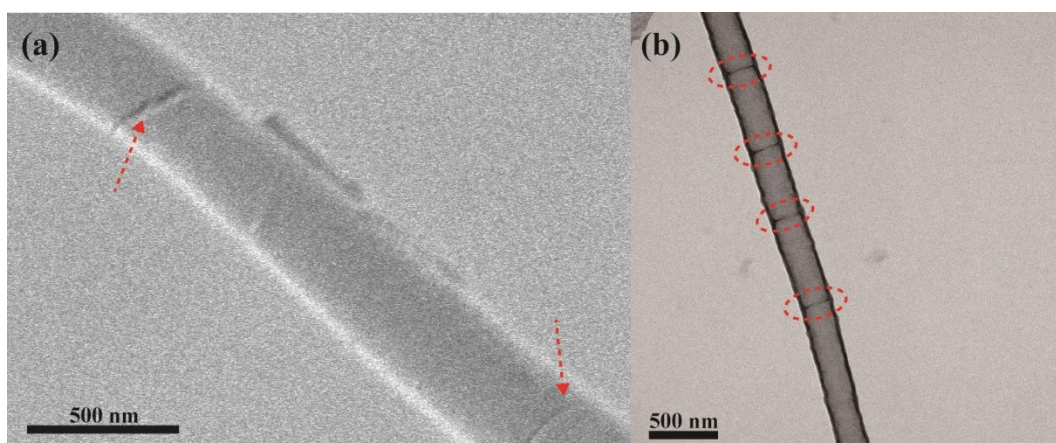

**Figure S12 (a) SEM micrograph of a nanofiber, (b) TEM micrograph of a hollow nanotube in 100cy-ALD aerogels after cyclic compression, demonstrating fracture of  $\text{Al}_2\text{O}_3$  coating on the surface of nanofibers after cyclic compression test.**

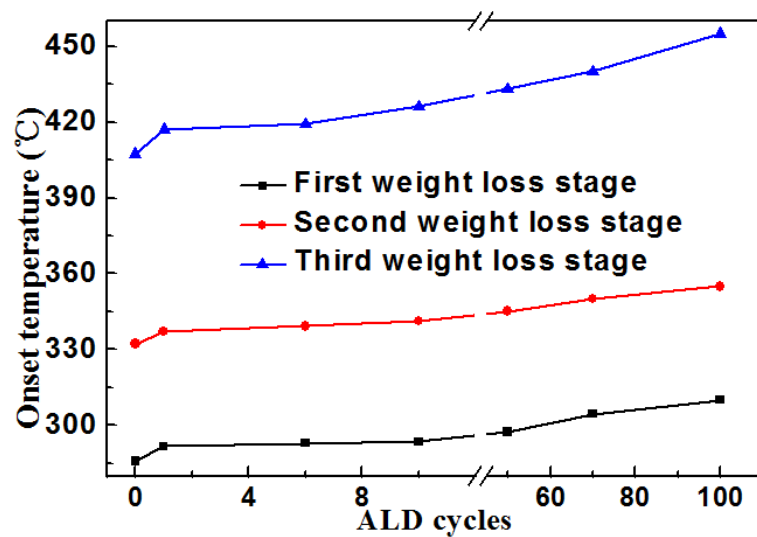

Figure S13 the onset temperature of three weight loss stages of aerogels with various ALD cycles, demonstrating that with increasing cycles of ALD, the thermal stability of aerogels improved.

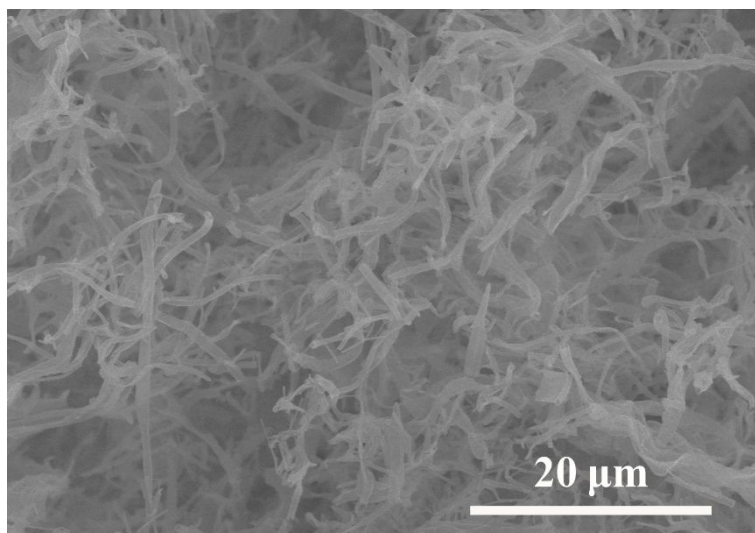

**Figure S14 FE-SEM micrograph of  $\text{Al}_2\text{O}_3$  nanotubes aerogels, the internal porous structure of hollow nanotube aerogels was exhibited, demonstrating good thermal stability of  $\text{Al}_2\text{O}_3$  nanotubes aerogels**

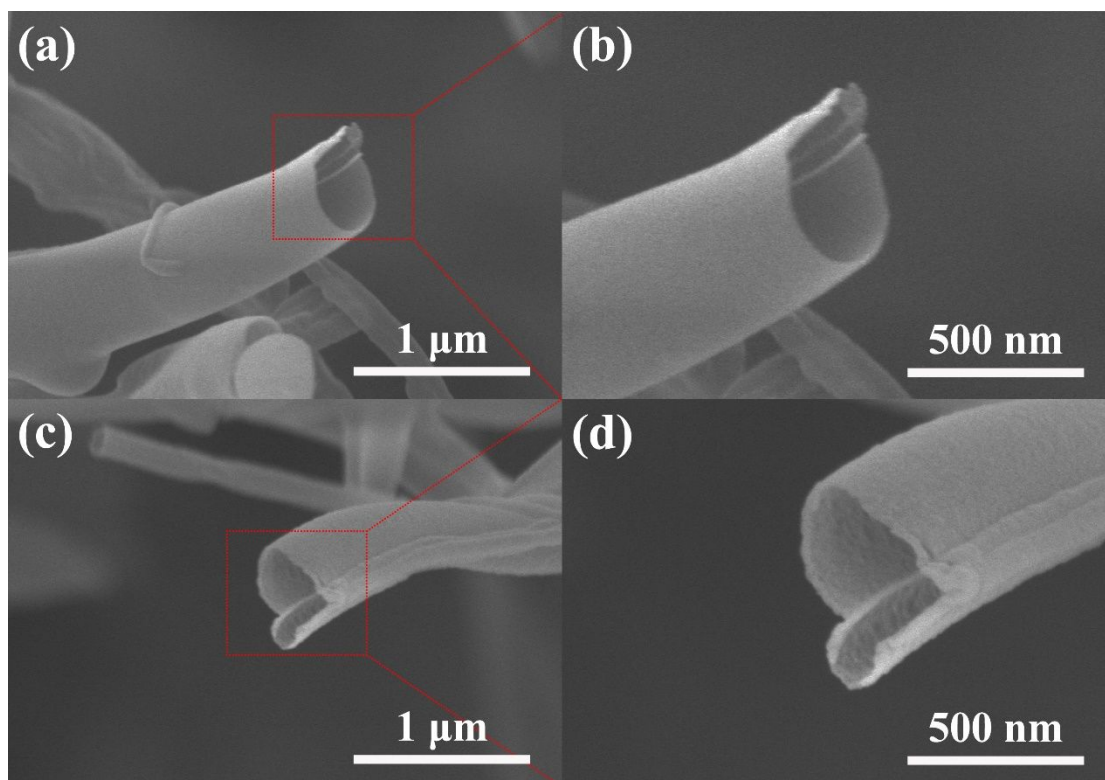

**Figure S15 FE-SEM micrographs of 100-cy ALD  $\text{Al}_2\text{O}_3$  nanotubes (a) surface and (c) buried surface of hollow nanotube aerogels, (b, d) close-ups on  $\text{Al}_2\text{O}_3$  nanotubes demonstrate their hollow structure.**



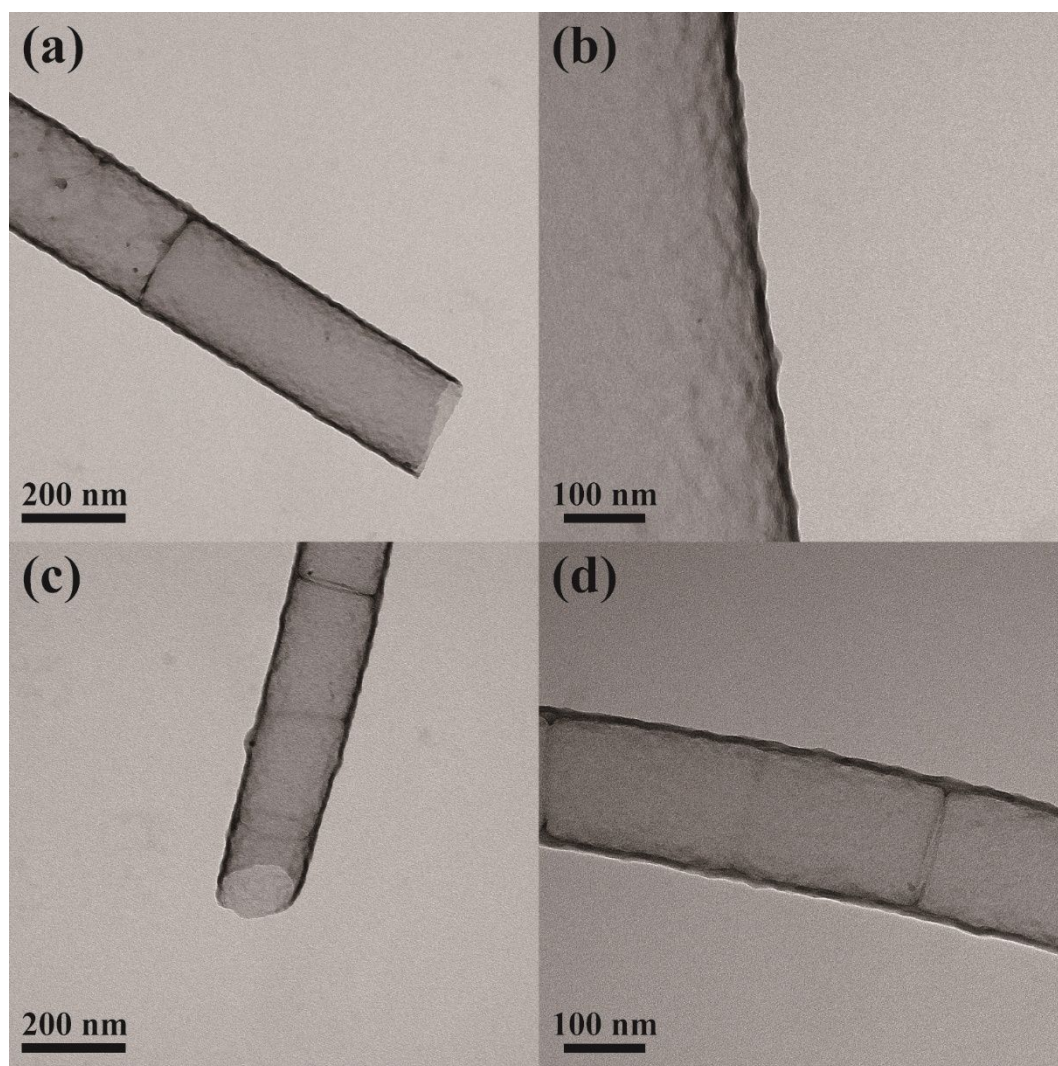

**Figure S16** TEM micrographs of the continuous and uniform 100cy-ALD  $\text{Al}_2\text{O}_3$  coatings of (a, b) surface and (c, d) inner nanotubes of hollow aerogels various magnifications, demonstrating both exterior and interior of aerogels are uniformly coated by  $\text{Al}_2\text{O}_3$ .



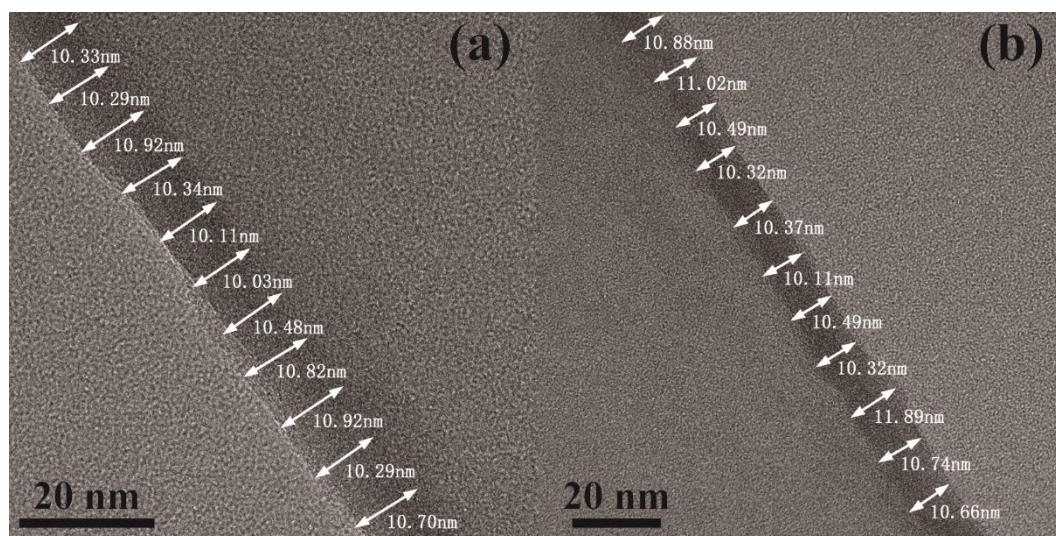

**Figure S17** The thickness of 100-cy ALD  $\text{Al}_2\text{O}_3$  coatings at (a) surface and (b) buried surface of hollow nanotube aerogels, demonstrating the thickness of  $\text{Al}_2\text{O}_3$  coating inside and outside the aerogels is almost constant.

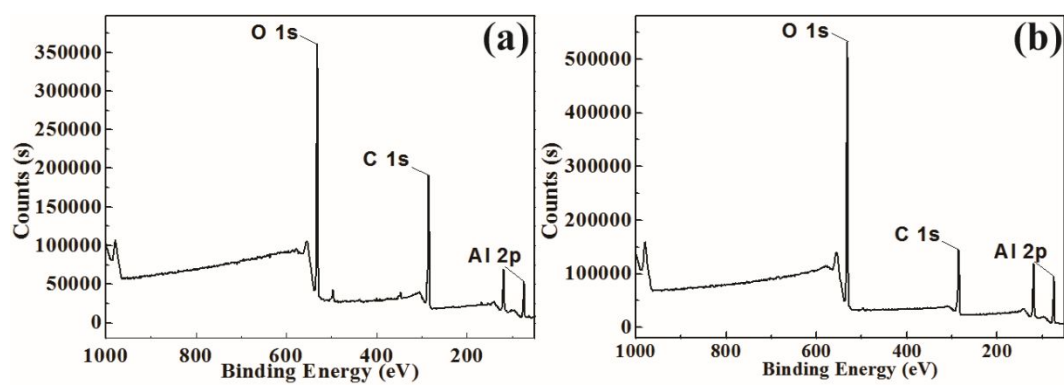

**Figure S18 XPS survey scans of 100cy-ALD aerogels before (f) and after (g) pyrolysis, demonstrating that carbon element decreased after pyrolysis.**

**Table S1 Physical properties of the aerogels with various ALD cycles.**

| Samples | Mass<br>(mg) | Volume<br>(cm <sup>3</sup> ) | Density<br>(mg/cm <sup>3</sup> ) | Porosity<br>(%) | Average pore<br>size (μm) | S <sub>BET</sub><br>(m <sup>2</sup> /g) |
|---------|--------------|------------------------------|----------------------------------|-----------------|---------------------------|-----------------------------------------|
| 0cy     | 198.4        | 12.80                        | 15.50                            | 98.55           | 3.85                      | 15.96                                   |
| 1cy     | 199.2        | 11.64                        | 17.11                            | 98.40           | 3.37                      | 37.46                                   |
| 6cy     | 201.3        | 11.32                        | 17.78                            | 98.35           | 2.98                      | 44.72                                   |
| 10cy    | 204.4        | 11.37                        | 17.98                            | 98.34           | 2.51                      | 37.96                                   |
| 50cy    | 214.4        | 10.97                        | 19.54                            | 98.25           | 2.42                      | 29.94                                   |
| 70cy    | 223.7        | 10.82                        | 20.67                            | 98.20           | 2.23                      | 20.81                                   |
| 100cy   | 229.8        | 10.91                        | 21.06                            | 98.19           | 2.06                      | 17.68                                   |

**Table S2 Surface average roughness ( $R_{sa}$ ) of nanofibers' in 0, 6 and 100cy-ALD aerogels.**

| Samples | Number | $R_{sa}$ (nm) | $R_{sa}$ of nanofibers (nm) |
|---------|--------|---------------|-----------------------------|
| 0cy     | 1      | 3.19          | 2.95                        |
|         | 2      | 3.01          |                             |
|         | 3      | 2.64          |                             |
| 6cy     | 1      | 4.77          | 4.46                        |
|         | 2      | 3.96          |                             |
|         | 3      | 4.64          |                             |
| 100cy   | 1      | 3.41          | 3.42                        |
|         | 2      | 3.63          |                             |
|         | 3      | 3.23          |                             |

**Table S3 Peak BE and atomic ratio of surface elements and chemical bonds of 0, 1 and 6cy-ALD aerogels.**

| Samples | Element | Peak BE (eV) | Atomic (%) | Chemical bond | Peak BE (eV) | Atomic (%) |
|---------|---------|--------------|------------|---------------|--------------|------------|
| 0cy     | C 1s    | 285.32       | 75.96      | C-C/C-H       | 284.73       | 64.38      |
|         |         |              |            | C-O-C         | 286.22       | 27.90      |
|         |         |              |            | C=O           | 287.44       | 4.99       |
|         |         |              |            | O-C=O         | 288.96       | 2.74       |
|         | O 1s    | 532.79       | 24.04      | C-O/C=O       | 532.45       | 100.00     |
|         | Al 2p   | -            | 0          | -             | -            | 0          |
| 1cy     | C 1s    | 285.24       | 64.98      | C-C/C-H       | 284.69       | 64.80      |
|         |         |              |            | C-O-C         | 286.21       | 27.77      |
|         |         |              |            | C=O           | 287.80       | 3.74       |
|         |         |              |            | O-C=O         | 289.09       | 3.69       |
|         | O 1s    | 532.26       | 29.60      | Al-O          | 531.35       | 18.59      |
|         |         |              |            | C-O/C=O       | 532.30       | 81.41      |
|         | Al 2p   | 74.77        | 5.42       | Al-O          | 74.51        | 100.00     |
| 6cy     | C 1s    | 285.09       | 68.90      | C-C/C-H       | 284.79       | 64.80      |
|         |         |              |            | C-O-C         | 286.19       | 27.77      |
|         |         |              |            | C=O           | 287.61       | 3.74       |
|         |         |              |            | O-C=O         | 289.01       | 3.69       |
|         | O 1s    | 532.13       | 25.14      | Al-O          | 531.44       | 35.27      |
|         |         |              |            | C-O/C=O       | 532.24       | 64.73      |
|         | Al 2p   | 74.41        | 5.96       | Al-O          | 73.74        | 100.00     |

**Table S4 Peak BE and atomic ratio of surface elements of 100cy-ALD aerogels before and after pyrolysis.**

| Samples             | Element | Peak BE (eV) | Atomic (%) |
|---------------------|---------|--------------|------------|
| Before<br>pyrolysis | C 1s    | 285.17       | 43.49      |
|                     | O 1s    | 531.83       | 37.74      |
|                     | Al 2p   | 74.81        | 18.77      |
| After<br>pyrolysis  | C 1s    | 285.21       | 26.10      |
|                     | O 1s    | 531.80       | 46.97      |
|                     | Al 2p   | 74.86        | 26.93      |

**Table S5 Comparison of sorption capacities of various sorbents.**

| Sorbents                                                | Min<br>sorption<br>capacity<br>(g/g) | Max<br>sorption<br>capacity<br>(g/g) | Density<br>(mg/cm <sup>3</sup> ) | Porosity<br>(%) | Cost   | Reference        |
|---------------------------------------------------------|--------------------------------------|--------------------------------------|----------------------------------|-----------------|--------|------------------|
| PVA-CNF hybrid<br>aerogels                              | 44.56                                | 95.25                                | 13                               | 99.01           | Medium | 2                |
| PVA-co-PE NFA<br>aerogels                               | 23                                   | 50                                   | 11.1                             | 99              | Low    | 3                |
| Cellulose<br>nanofibril aerogels                        | 23                                   | 46                                   | 23.2                             | 98.5            | Low    | 4                |
| Cellulose nanofibril<br>aerogels                        | 65                                   | 205                                  | 2.9                              | 99.81           | Low    | 5                |
| Carbon aerogels                                         | 74.22                                | 223.56                               | 7.8                              | -               | Medium | 6                |
| Polydimethylsiloxane<br>sponge                          | 4                                    | 11                                   | 180 ~ 750                        | -               | Medium | 7                |
| Microporous<br>conjugated polymers                      | 6                                    | 23                                   | -                                | -               | High   | 8                |
| Cellulose nanofibril<br>aerogels                        | 139                                  | 256                                  | 1.7~8.1                          | 99.5~99.<br>9   | Low    | 9                |
| Carbon nanofiber<br>aerogels                            | 51                                   | 139                                  | 10                               | > 99            | Medium | 10               |
| Carbon nanofiber<br>aerogels                            | 106                                  | 312                                  | 4~6                              | 99.7            | Medium | 11               |
| Carbonaceous fiber<br>aerogel                           | 22                                   | 87                                   | 36                               | -               | Medium | 12               |
| Cellulose nanocrystal<br>aerogel                        | 34                                   | 99                                   | 22.4~23.3                        | 96.3~97.<br>2   | High   | 13               |
| Carbon-based aerogels                                   | 393                                  | 1002                                 | 0.7~10.2                         | 99              | High   | 14               |
| Melamine sponge                                         | 69                                   | 176                                  | -                                | -               | Low    | 15               |
| Graphene aerogels                                       | 19                                   | 26                                   | -                                | 97.6            | High   | 16               |
| EVOH nanofibrous<br>aerogels                            | 44.83                                | 101.86                               | 12.3                             | 98.95           | Low    | 17               |
| EVOH NFAs coated<br>with Al <sub>2</sub> O <sub>3</sub> | 30.57                                | 73.03                                | 17.78                            | 98.35           | Low    | Present<br>study |

The work mentioned in the paper is defined as the work doing for generating compression deformation per unit volume,<sup>18, 19</sup> which was defined as

$$W = \int_{\varepsilon_1}^{\varepsilon_2} \sigma d\varepsilon \quad (1)$$

where  $W$  is the work,  $\varepsilon_1$  and  $\varepsilon_2$  are the initial and final compression strain, respectively, and  $\sigma$  is the compression stress. The compression work and recovery work were calculated by the integration of the relevant stress-strain curves. The energy dissipation was the difference of the absolute value of compression work and recovery work.

**Movie S1 Dynamic compressive behavior of 6cy-ALD aerogels under a 60% compressive strain. 6cy-ALD aerogels completely recovered their original shape with no mechanical failure after being subjected to 60% strain.**

**Movie S2 Canola oil was absorbed by 6cy-ALD aerogels. The canola oil dyed with Sudan red III was completely absorbed by 6cy-ALD aerogels in 10 s, the oil-filled aerogels could float on water without any oil release.**

**Movie S3 Chloroform was absorbed by 6cy-ALD aerogels. 6cy-ALD aerogels could absorb the chloroform dyed with Sudan red III at the bottom of water without water absorption.**



## REFERENCES

- (1) Nguyen, H. M. T.; Tang, H. Y.; Huang, W. F.; Lin, M. C. Mechanisms for Reactions of Trimethylaluminum with Molecular Oxygen and Water. *Comput. Theor. Chem.* **2014**, *1035*, 39-43.
- (2) Zheng, Q. F.; Cai, Z. Y.; Gong, S. Q. Green Synthesis of Polyvinyl Alcohol (PVA)-Cellulose Nanofibril (CNF) Hybrid Aerogels and Their Use as Superabsorbents. *J. Mater. Chem. A* **2014**, *2*, 3110-3118.
- (3) Liu, Q. Z.; Chen, J. H.; Mei, T.; He, X. W.; Zhong, W. B.; Liu, K.; Wang, W. W.; Wang, Y. D.; Li, M. F.; Wang, D. A Facile Route to the Production of Polymeric Nanofibrous Aerogels for Environmentally Sustainable Applications. *J. Mater. Chem. A* **2018**, *6*, 3692-3704.
- (4) Mulyadi, A.; Zhang, Z.; Deng, Y. L. Fluorine-Free Oil Absorbents Made from Cellulose Nanofibril Aerogels. *ACS Appl. Mater. Interfaces* **2016**, *8*, 2732-2740.
- (5) Laitinen, O.; Suopajarvi, T.; Osterberg, M.; Liimatainen, H. Hydrophobic, Superabsorbing Aerogels from Choline Chloride-Based Deep Eutectic Solvent Pretreated and Silylated Cellulose Nanofibrils for Selective Oil Removal. *ACS Appl. Mater. Interfaces* **2017**, *9*, 25029-25037.
- (6) Chen, W. S.; Zhang, Q.; Uetani, K.; Li, Q.; Lu, P.; Cao, J.; Wang, Q. W.; Liu, Y. X.; Li, J.; Quan, Z. C.; Zhang, Y. S.; Wang, S. F.; Meng, Z. Y.; Yu, H. P. Sustainable Carbon Aerogels Derived from Nanofibrillated Cellulose as High-Performance Absorption Materials. *Adv. Mater. Interfaces* **2016**, *3*, 1-9.
- (7) Choi, S. J.; Kwon, T. H.; Im, H.; Moon, D. I.; Baek, D. J.; Seol, M. L.; Duarte, J. P.; Choi, Y. K. A Polydimethylsiloxane (PDMS) Sponge for the Selective Absorption of Oil from Water. *ACS Appl. Mater. Interfaces* **2011**, *3*, 4552-4556.
- (8) Li, A.; Sun, H. X.; Tan, D. Z.; Fan, W. J.; Wen, S. H.; Qing, X. J.; Li, G. X.; Li, S. Y.; Deng, W. Q. Superhydrophobic Conjugated Microporous Polymers for Separation and Adsorption. *Energy Environ. Sci.* **2011**, *4*, 2062-2065.
- (9) Jiang, F.; Hsieh, Y. L. Amphiphilic Superabsorbent Cellulose Nanofibril Aerogels. *J. Mater. Chem. A* **2014**, *2*, 6337-6342.
- (10) Wu, Z. Y.; Li, C.; Liang, H. W.; Zhang, Y. N.; Wang, X.; Chen, J. F.; Yu, S. H. Carbon Nanofiber Aerogels for Emergent Cleanup of Oil Spillage and Chemical Leakage under Harsh Conditions. *Sci Rep.* **2014**, *4*, 4-16.
- (11) Wu, Z. Y.; Li, C.; Liang, H. W.; Chen, J. F.; Yu, S. H. Ultralight, Flexible, and Fire-Resistant Carbon Nanofiber Aerogels from Bacterial Cellulose. *Angew. Chem., Int. Ed.* **2013**, *52*, 2925-2929.
- (12) Liu, R. L.; Li, X. Q.; Liu, H. Q.; Luo, Z. M.; Ma, J.; Zhang, Z. Q.; Fu, Q. Eco-Friendly Fabrication of Sponge-Like Magnetically Carbonaceous Fiber Aerogel for High-Efficiency Oil-Water Separation. *Rsc Adv.* **2016**, *6*, 30301-30310.
- (13) Ma, H. Q.; Wang, S. J.; Meng, F. B.; Xu, X. Y.; Huo, X. L. A Hydrazone-Carboxyl Ligand-Linked Cellulose Nanocrystal Aerogel with High Elasticity and Fast Oil/Water Separation. *Cellulose* **2017**, *24*, 797-809.
- (14) Li, C.; Wu, Z. Y.; Liang, H. W.; Chen, J. F.; Yu, S. H. Ultralight Multifunctional Carbon-Based Aerogels by Combining Graphene Oxide and Bacterial Cellulose. *Small* **2017**, *13*, 1-8.
- (15) Huang, S. Y.; Li, X.; Jiao, Y. Q.; Shi, J. F. Fabrication of a Superhydrophobic, Fire-Resistant, and Mechanical Robust Sponge upon Polyphenol Chemistry for Efficiently Absorbing

Oils/Organic Solvents. *Ind. Eng. Chem. Res.* **2015**, *54*, 1842-1848.

(16) Ren, R. P.; Li, W.; Lv, Y. K. A Robust, Superhydrophobic Graphene Aerogel as a Recyclable Sorbent for Oils and Organic Solvents at Various Temperatures. *J. Colloid Interface Sci.* **2017**, *500*, 63-68.

(17) Lu, J. W.; Xu, D. D.; Wei, J. K.; Yan, S.; Xiao, R. Superoleophilic and Flexible Thermoplastic Polymer Nanofiber Aerogels for Removal of Oils and Organic Solvents. *ACS Appl. Mater. Interfaces* **2017**, *9*, 25533-25541.

(18) Schaedler, T. A.; Jacobsen, A. J.; Torrents, A.; Sorensen, A. E.; Lian, J.; Greer, J. R.; Valdevit, L.; Carter, W. B. Ultralight Metallic Microlattices. *Science* **2011**, *334*, 962-965.

(19) Si, Y.; Yu, J. Y.; Tang, X. M.; Ge, J. L.; Ding, B. Ultralight Nanofibre-Assembled Cellular Aerogels with Superelasticity and Multifunctionality. *Nat. Commun.* **2014**, *5*, 1-9.
